# Supplementary material for: Bioactive Metabolites from the Deep Subseafloor Fungus Oidiodendron griseum UBOCC-A-114129
Source: PubMed Central journal article supplement (PMC5408257; doi:10.3390/md15040111), 2017-04-07
Supplement: marinedrugs-15-00111-s001.pdf [file marinedrugs-15-00111-s001.pdf]

## Supplementary Data

### 1. Nuclear magnetic resonance (NMR) spectral data

| Atome | Fuscin                |                     | Dihydrofuscin         |                                        |
|-------|-----------------------|---------------------|-----------------------|----------------------------------------|
|       | $\delta^{13}\text{C}$ | $\delta^1\text{H}$  | $\delta^{13}\text{C}$ | $\delta^1\text{H}$                     |
| 2     | 76,9                  |                     | 75,6                  |                                        |
| 3     | 31,5                  | 1,87 (br t) J=6,7Hz | 32,6                  | 1,85 (br t) J=6,4Hz                    |
| 4     | 18                    | 2,61 (m)            | 18,7                  | 2,51 (m) et 2,61 (m)                   |
| 5     | 116,4                 |                     | 109,9                 |                                        |
| 6     | 147,1                 |                     | 141,1                 |                                        |
| 7     | 175,5                 |                     | 130,5                 |                                        |
| 8     | 142,1                 |                     | 137,3                 |                                        |
| 9     | 114,4                 |                     | 114,1                 |                                        |
| 10    | 72,5                  | 5,73 (q) J=6,7Hz    | 74,3                  | 5,83 (q) J=6,8Hz                       |
| 12    | 163,0                 |                     | 170,9                 |                                        |
| 13    | 117,2                 | 6,35 (s)            | 30,6                  | 3,43 (d) J=19,8Hz et 3,66 (d) J=19,8Hz |
| 14    | 139,9                 |                     | 118,0                 |                                        |
| 15    | 26,2                  | 1,39 (s)            | 26,3                  | 1,33 (s)                               |
| 16    | 26,6                  | 1,42 (s)            | 27,0                  | 1,37 (s)                               |
| 17    |                       |                     |                       | 5,32 (s)                               |
| 18    |                       | 6,90 (br s)         |                       | 5,29 (s)                               |
| 19    | 22,4                  | 1,60 (d) J=6,7Hz    | 22                    | 1,57 (d) J=6,8Hz                       |

| Atome | Secofuscin            |                                | Dihydrosecofuscin     |                                        |
|-------|-----------------------|--------------------------------|-----------------------|----------------------------------------|
|       | $\delta^{13}\text{C}$ | $\delta^1\text{H}$             | $\delta^{13}\text{C}$ | $\delta^1\text{H}$                     |
| 2     | 72,7                  | 5,76 (q) J=6,6Hz               | 74,0                  | 5,84 (q) J=6,8Hz                       |
| 3     | 117,1                 |                                | 115,1                 |                                        |
| 4     | 141,2                 |                                | 138,3                 |                                        |
| 5     | 175,3                 |                                | 130,5                 |                                        |
| 6     | 145,8                 |                                | 142,1                 |                                        |
| 7     | 121,3                 |                                | 115,8                 |                                        |
| 8     | 139,4                 |                                | 118,7                 |                                        |
| 9     | 121,2                 | 6,52 (s)                       | 31,3                  | 3,49 (d) J=19,6Hz et 3,76 (d) J=19,6Hz |
| 10    | 162,6                 |                                | 170,6                 |                                        |
| 11    | 22,6                  | 1,60 (d) J=6,6Hz               | 21,9                  | 1,57 (d) J=6,8Hz                       |
| 12    |                       | 6,62 (s)                       |                       | 5,24* (br s)                           |
| 13    |                       |                                |                       | 5,32* (br s)                           |
| 14    |                       | 6,67 (s)                       |                       | 5,46* (br s)                           |
| 15    | 23,5                  | 3,35 (br d) J=6,8Hz            | 25,0                  | 3,27 (br d) J=7,0Hz                    |
| 16    | 120,2                 | 5,07 (tspt) J=6,8Hz et J=1,5Hz | 120,9                 | 5,14 (tspt) J=7,0Hz et J=1,5Hz         |
| 17    | 134,3                 |                                | 136,6                 |                                        |
| 18    | 18,1                  | 1,78 (br d) J=1,5Hz            | 18,1                  | 1,84 (br d) J=1,5Hz                    |
| 20    | 25,7                  | 1,71 (br d) J=1,5Hz            | 25,8                  | 1,78 (br d) J=1,5Hz                    |

\*may be interchanged

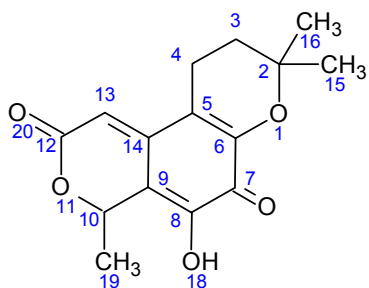

Fuscin

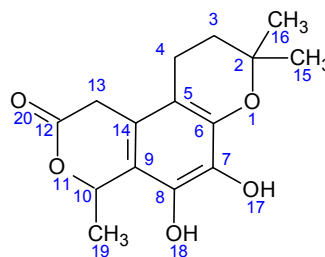

Dihydrofuscin

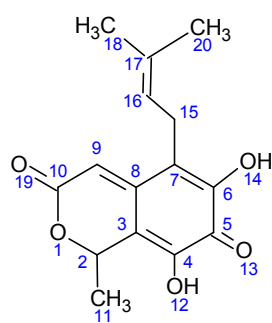

Secofuscin

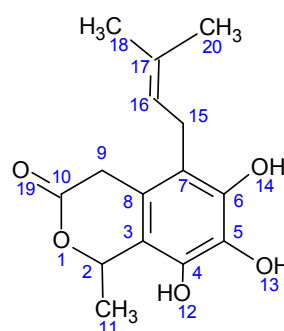

Dihydrosecofuscin

## 2. Kinase assays

The following buffers were used in this study: **Buffer A:** 10 mM MgCl<sub>2</sub>, 1 mM EGTA, 1 mM DTT, 25 mM Tris-HCl pH 7.5, 50 µg/mL heparin; **Buffer B:** 60mM β-glycerophosphate, 30 mM p-nitrophenyl-phosphate, 25 mM MOPS (pH 7), 5 mM EGTA, 15 mM MgCl<sub>2</sub>, 1mM DTT, 0.1 mM sodium orthovanadate; **Buffer H:** MOPS 25 mM pH 7.5, 10 mM MgCl<sub>2</sub>; **Buffer R:** 1.67 mM MOPS pH 7.2, 0.83 mM β-glycerophosphate, 1.33 mM MgCl<sub>2</sub>, 0.83 mM MnCl<sub>2</sub>, 0.33 mM EGTA, 0.13 mM EDTA, 16.67 µg/mL BSA, 0.017 mM DTT.

The kinases were assayed using the following experimental conditions: **RIPK3** (human, recombinant, expressed by baculovirus in Sf9 insect cells) was assayed in buffer R with 0.1 µg/µL of MBP as substrate; **HsPIM1** (human proto-oncogene, recombinant, expressed in bacteria) was assayed in buffer B with 0.8 µg/µL of histone H1 (Sigma #H5505) as substrate; **HsHaspin-kd** (human, kinase domain, amino acids 470 to 798, recombinant, expressed in bacteria) was assayed in buffer H with 0.007 µg/µL of Histone H3 (1-21) peptide (ARTKQTARKSTGGKAPRKQLA) as substrate; **HsCDK2/CyclinA** (cyclin-dependent kinase-2, human, kindly provided by Dr. A. Echaliier-Glazer, Leicester, UK) was assayed in buffer A (+ 0.15 mg/mL of BSA + 0.23 mg/mL of DTT) with 0.8 µg/µL of histone H1 as substrate; **HsCDK9/CyclinT** (human, recombinant, expressed by baculovirus in Sf9 insect cells) was assayed in buffer A (+ 0.15 mg/mL of BSA + 0.23 mg/mL of DTT) with 0.27 µg/µL of the following peptide: YSPTSPSYSPTSPSYSPTSPSKKKK, as substrate; **HsCDK5/p25** (human, recombinant, expressed in bacteria) was assayed in buffer B, with 0.8 µg/µL of histone H1 as substrate; **SscGSK-3α/β** (glycogen synthase kinase-3, porcine brain, native, affinity purified) was assayed in buffer A (+ 0.15 mg/mL of BSA + 0.23 mg/mL of DTT), with 0.010 µg/µL of GS-1 peptide, a GSK-3-selective substrate (YRRAAVPPSPSLSRHSSPHQSpEDEEE, "Sp" stands for phosphorylated serine); **SscCK1δ/ε** (casein kinase 1δ/ε, porcine brain, native, affinity purified) was assayed in buffer B, with 0.022 µg/µL of the following peptide: RRKHAAIGSpAYSITA as CK1-specific substrate; **RnDYRK1A-kd** (*Rattus norvegicus*, amino acids 1 to 499 including the kinase domain, recombinant, expressed in bacteria, DNA vector kindly provided by Dr. W. Becker, Aachen, Germany) was assayed in buffer A (+0.5 mg/mL of BSA + 0.23 mg/mL of DTT) with 0.033 µg/µL of the following peptide: KKISGRLSPIMTEQ as substrate; **MmCLK1** (from *Mus musculus*, recombinant, expressed in bacteria) was assayed in buffer A (+ 0.15 mg/mL of BSA + 0.23 mg/mL of DTT) with 0.027 µg/µL of the following peptide: GRSRSRSRSRSR as substrate; **LmCK1** (from *Leishmania major*, recombinant, expressed in bacteria) was assayed in buffer B (adjusted at pH 8) with 0.028 µg/µL of the following peptide: RRKHAAIGSpAYSITA as CK1-specific substrate.
